# Supplementary material for: Physical activity and fertility
Source: PubMed Central journal article supplement (PMC7614776; doi:10.1123/jpah.2022-0487), 2023-05-05
Supplement: EMS176148-supplement-Supplementary_Table_S1.pdf [file EMS176148-supplement-Supplementary_Table_S1.pdf]

**Supplementary Table S1.** Quality assessment ratings for cohort and cross-sectional studies included in the systematic review in publication date order<sup>a</sup>

| Year                            | Author                     | Q1        | Q2        | Q3        | Q4a       | Q4b       | Q5       | Q6       | Q7        | Q8        | Q9a       | Q9b       | Q10      | Q11a      | Q11b      | Q12      | Q13      | Q14       |
|---------------------------------|----------------------------|-----------|-----------|-----------|-----------|-----------|----------|----------|-----------|-----------|-----------|-----------|----------|-----------|-----------|----------|----------|-----------|
| <i>Female fertility outcome</i> |                            |           |           |           |           |           |          |          |           |           |           |           |          |           |           |          |          |           |
| 1994                            | Florack                    | Y         | Y         | Y         | Y         | Y         | N        | Y        | Y         | Y         | Y         | Y         | N        | Y         | Y         | Y        | Y        | Y         |
| 2007                            | Chavarro                   | Y         | Y         | NR        | Y         | Y         | N        | Y        | Y         | Y         | Y         | Y         | Y        | Y         | Y         | NA       | NR       | Y         |
| 2008                            | Wellons                    | Y         | Y         | Y         | Y         | Y         | N        | N        | Y         | N         | N         | Y         | N        | N         | Y         | NA       | NA       | Y         |
| 2009                            | Gumundsdottir              | Y         | Y         | Y         | Y         | Y         | N        | Y        | Y         | Y         | Y         | Y         | N        | Y         | Y         | NA       | N        | Y         |
| 2010                            | Revonta                    | Y         | Y         | NR        | Y         | Y         | N        | N        | NR        | N         | N         | Y         | N        | N         | Y         | NA       | NA       | N         |
| 2011                            | Burdorf                    | Y         | Y         | Y         | Y         | Y         | N        | N        | Y         | N         | Y         | Y         | N        | Y         | Y         | NA       | NA       | Y         |
| 2012                            | Wise                       | Y         | Y         | Y         | N         | Y         | N        | Y        | Y         | Y         | Y         | Y         | N        | Y         | Y         | NA       | Y        | Y         |
| 2012                            | Mutsaerts                  | Y         | Y         | Y         | Y         | Y         | N        | N        | Y         | Y         | Y         | Y         | N        | Y         | Y         | NA       | NA       | Y         |
| 2012                            | Esmaeilzadeh               | Y         | Y         | Y         | Y         | Y         | Y        | N        | Y         | N         | Y         | Y         | N        | Y         | Y         | NA       | NA       | Y         |
| 2013                            | Esmaeilzadeh               | Y         | Y         | Y         | Y         | Y         | Y        | N        | Y         | Y         | Y         | Y         | N        | Y         | Y         | NA       | NA       | Y         |
| 2015                            | Gaskins                    | Y         | Y         | Y         | N         | Y         | N        | Y        | Y         | Y         | Y         | Y         | N        | Y         | Y         | NA       | NR       | Y         |
| 2015                            | Khosrorad                  | Y         | Y         | NR        | Y         | Y         | Y        | N        | NR        | Y         | Y         | Y         | N        | N         | Y         | NA       | NA       | N         |
| 2016                            | Cong                       | Y         | Y         | NR        | Y         | Y         | NR       | N        | NA        | Y         | Y         | Y         | N        | Y         | Y         | NA       | NA       | N         |
| 2016                            | McKinnon                   | Y         | Y         | Y         | N         | Y         | N        | Y        | Y         | Y         | Y         | Y         | N        | Y         | Y         | NR       | N        | Y         |
| 2018                            | Russo                      | Y         | Y         | Y         | Y         | Y         | N        | Y        | Y         | Y         | Y         | Y         | N        | Y         | Y         | NR       | NA       | Y         |
| 2019                            | Taberner-Rico <sup>b</sup> | Y         | Y         | Y         | N         | Y         | Y        | N        | N         | Y         | Y         | Y         | N        | N         | Y         | NA       | NA       | Y         |
| 2020                            | Mena                       | Y         | Y         | Y         | Y         | Y         | N        | N        | N         | Y         | Y         | Y         | Y        | Y         | Y         | NA       | NR       | Y         |
| 2020                            | Lam                        | Y         | Y         | NR        | Y         | Y         | Y        | Y        | Y         | N         | Y         | Y         | N        | Y         | Y         | NA       | Y        | N         |
| 2020                            | Mirzaei                    | Y         | Y         | NR        | Y         | Y         | N        | N        | N         | Y         | Y         | Y         | N        | Y         | Y         | NA       | NA       | Y         |
| 2021                            | Shirazi                    | Y         | Y         | NR        | Y         | Y         | N        | N        | N         | N         | Y         | Y         | N        | Y         | Y         | NA       | NA       | Y         |
| <b>Total “Yes”</b>              |                            | <b>20</b> | <b>20</b> | <b>13</b> | <b>16</b> | <b>20</b> | <b>5</b> | <b>8</b> | <b>13</b> | <b>14</b> | <b>18</b> | <b>20</b> | <b>2</b> | <b>16</b> | <b>20</b> | <b>1</b> | <b>3</b> | <b>16</b> |
| <i>Male fertility outcome</i>   |                            |           |           |           |           |           |          |          |           |           |           |           |          |           |           |          |          |           |
| 1988                            | Baker                      | Y         | Y         | NR        | Y         | Y         | N        | N        | Y         | N         | Y         | Y         | N        | Y         | Y         | NA       | NA       | N         |
| 2014                            | Hollingworth               | Y         | N         | NR        | Y         | Y         | N        | N        | Y         | Y         | Y         | Y         | N        | Y         | Y         | NA       | NA       | Y         |
| 2020                            | Lam                        | Y         | Y         | NR        | Y         | Y         | Y        | Y        | Y         | N         | Y         | Y         | N        | Y         | Y         | NA       | Y        | N         |

|                    |          |          |          |          |          |          |          |          |          |          |          |          |          |          |          |          |          |
|--------------------|----------|----------|----------|----------|----------|----------|----------|----------|----------|----------|----------|----------|----------|----------|----------|----------|----------|
| <b>Total “Yes”</b> | <b>3</b> | <b>2</b> | <b>0</b> | <b>3</b> | <b>3</b> | <b>1</b> | <b>1</b> | <b>3</b> | <b>1</b> | <b>3</b> | <b>3</b> | <b>0</b> | <b>3</b> | <b>3</b> | <b>0</b> | <b>1</b> | <b>1</b> |
|--------------------|----------|----------|----------|----------|----------|----------|----------|----------|----------|----------|----------|----------|----------|----------|----------|----------|----------|

<sup>a</sup>Quality of included studies was assessed using the National Institutes of Health Study Quality Assessment Tool for Observational Cohort and Cross-Sectional Studies (<http://www.nhlbi.nih.gov/health-pro/guidelines/in-develop/cardiovascular-risk-reduction/tools/cohort>). **Q1:** Was the research question or objective in this paper clearly stated?; **Q2:** Was the study population clearly specified and defined?; **Q3:** Was the participation rate of eligible persons at least 50%?; **Q4a:** Were all subjects selected or recruited from the same or similar populations (including the same time period)?; **Q4b:** Were inclusion and exclusion criteria for being in the study prespecified and applied uniformly to all participants?; **Q5:** Was a sample size justification, power description, or variance and effect estimates provided?; **Q6:** Were the exposures of interest measured prior to the outcomes being measured?; **Q7:** Was the timeframe sufficient so that one could reasonably expect to see an association between the exposure and outcome if it existed?; **Q8:** For exposures that can vary in amount or level, did the study examine different levels of the exposure as it related to the outcome?; **Q9a:** Were the exposure measures clearly defined?; **Q9b:** Were the exposure measures implemented consistently across all study participants?; **Q10:** Was the exposure assessed more than once over time?; **Q11a:** Were the outcome measures clearly defined?; **Q11b:** Were the outcome measures implemented consistently across all study participants?; **Q12:** Were the outcome assessors blinded to the exposure status of participants?; **Q13:** Was loss to follow-up after baseline 20% or less?; **Q14:** Were potential confounding variables measured and adjusted statistically for their impact on the relationship between the exposure and outcome? Y, yes; N, No; NR, not reported; NA, not applicable.

<sup>b</sup>Study enrolled two groups of women into an observational study: a subfertile group referred after an infertility consultation and a pregnant group attending their first prenatal appointment. The authors described the study as a “prospective comparative study with two groups”. We evaluated the quality based on the cohort study assessment.
