# Supplementary material for: Physical activity and fertility
Source: PubMed Central journal article supplement (PMC7614776; doi:10.1123/jpah.2022-0487), 2023-05-05
Supplement: EMS176148-supplement-Supplementary_Table_S3.pdf [file EMS176148-supplement-Supplementary_Table_S3.pdf]

**Supplementary Table S3.** Quality assessment ratings for controlled intervention studies included in the systematic review in publication date order<sup>a</sup>

| Year               | Author                                                | Q1       | Q2       | Q3       | Q4       | Q5       | Q6       | Q7       | Q8       | Q9       | Q10      | Q11      | Q12      | Q13      | Q14      |
|--------------------|-------------------------------------------------------|----------|----------|----------|----------|----------|----------|----------|----------|----------|----------|----------|----------|----------|----------|
| 2017               | Maleki-<br><i>J Obstet<br/>Gynaecol<br/>Can</i>       | Y        | Y        | N        | N        | NR       | Y        | Y        | Y        | NR       | Y        | Y        | Y        | Y        | N        |
| 2017               | Maleki-<br><i>Appl<br/>Physiol<br/>Nutr<br/>Metab</i> | Y        | Y        | N        | N        | NR       | Y        | Y        | Y        | Y        | Y        | Y        | Y        | Y        | N        |
| 2017               | Maleki-<br><i>Cytokine</i>                            | Y        | Y        | N        | N        | NR       | Y        | Y        | Y        | NR       | Y        | Y        | Y        | Y        | N        |
| 2018               | Maleki                                                | Y        | Y        | N        | N        | NR       | Y        | Y        | Y        | Y        | Y        | Y        | Y        | Y        | N        |
| 2020               | Maleki                                                | Y        | Y        | N        | N        | NR       | Y        | Y        | Y        | NR       | Y        | Y        | N        | Y        | N        |
| <b>Total “Yes”</b> |                                                       | <b>5</b> | <b>5</b> | <b>0</b> | <b>0</b> | <b>0</b> | <b>5</b> | <b>5</b> | <b>5</b> | <b>2</b> | <b>5</b> | <b>5</b> | <b>4</b> | <b>5</b> | <b>0</b> |

<sup>a</sup>Quality of included studies was assessed using the National Institutes of Health Study Quality Assessment Tool for Controlled Intervention Studies (<https://www.nhlbi.nih.gov/health-topics/study-quality-assessment-tools>) **Q1:** Was the study described as randomized, a randomized trial, a randomized clinical trial, or an RCT?; **Q2:** Was the method of randomization adequate (i.e., use of randomly generated assignment)?; **Q3:** Was the treatment allocation concealed (so that assignments could not be predicted)?; **Q4:** Were study participants and providers blinded to treatment group assignment?; **Q5:** Were the people assessing the outcomes blinded to the participants' group assignments?; **Q6:** Were the groups similar at baseline on important characteristics that could affect outcomes (e.g., demographics, risk factors, co-morbid conditions)?; **Q7:** Was the overall drop-out rate from the study at endpoint 20% or lower of the number allocated to treatment?; **Q8:** Was the differential drop-out rate (between treatment groups) at endpoint 15 percentage points or lower?; **Q9:** Was there high adherence to the intervention protocols for each treatment group?; **Q10:** Were other interventions avoided or similar in the groups (e.g., similar background treatments)?; **Q11:** Were outcomes assessed using valid and reliable measures, implemented consistently across all study participants?; **Q12:** Did the authors report that the sample size was sufficiently large to be able to detect a difference in the main outcome between groups with at least 80% power?; **Q13:** Were outcomes reported or

subgroups analyzed prespecified (i.e., identified before analyses were conducted)?; **Q14:** Were all randomized participants analyzed in the group to which they were originally assigned, i.e., did they use an intention-to-treat analysis?; Y, yes; N, No; NR, not reported; NA, not applicable.
